# Supplementary material for: LDH/MXene Synergistic Carrier Separation Effects to Improve the Photoelectric Catalytic Activities of Bi2WO6 Nanosheet Arrays
Source: MDPI journal article supplement (doi:10.3390/nano14050477), 2024-03-06
Supplement: s1 [file s1]

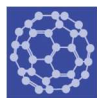

## Article

# LDH/MXene Synergistic Carrier Separation Effects to Improve the Photoelectric Catalytic Activities of Bi<sub>2</sub>WO<sub>6</sub> Nanosheet Arrays

Yuting Wang <sup>†</sup>, Runhua Li <sup>†</sup>, Jiaying Zhang, Liming Liu, Weiwei Huang and Yajun Wang <sup>\*</sup>

State Key Laboratory of Heavy Oil Processing, China University of Petroleum, Beijing 102249, China; wangyt@cup.edu.cn (Y.W.); 2021215954@student.cup.edu.cn (R.L.); 2020211160@student.cup.edu.cn (J.Z.); 2021211158@student.cup.edu.cn (L.L.); 2022211152@student.cup.edu.cn (W.H.)

<sup>\*</sup> Correspondence: wangyajun@cup.edu.cn

<sup>†</sup> These authors contributed equally to this work.

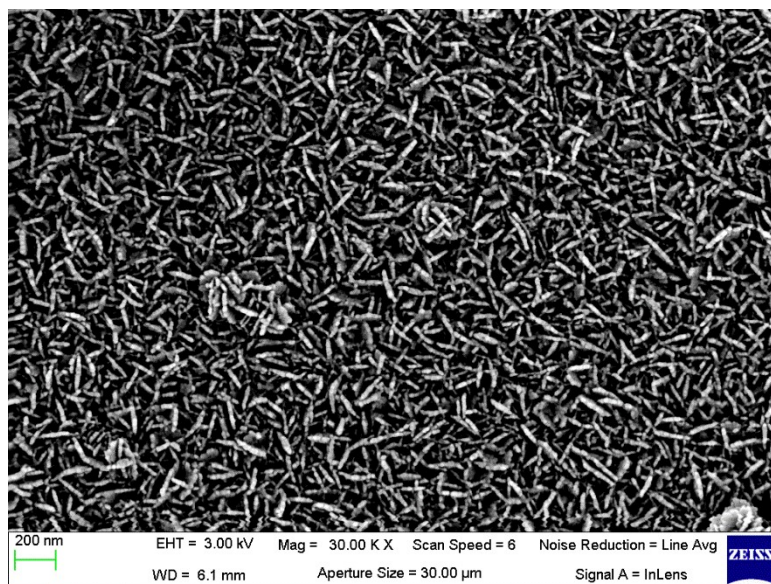

Figure S1. SEM image of Bi<sub>2</sub>WO<sub>6</sub> NAs.

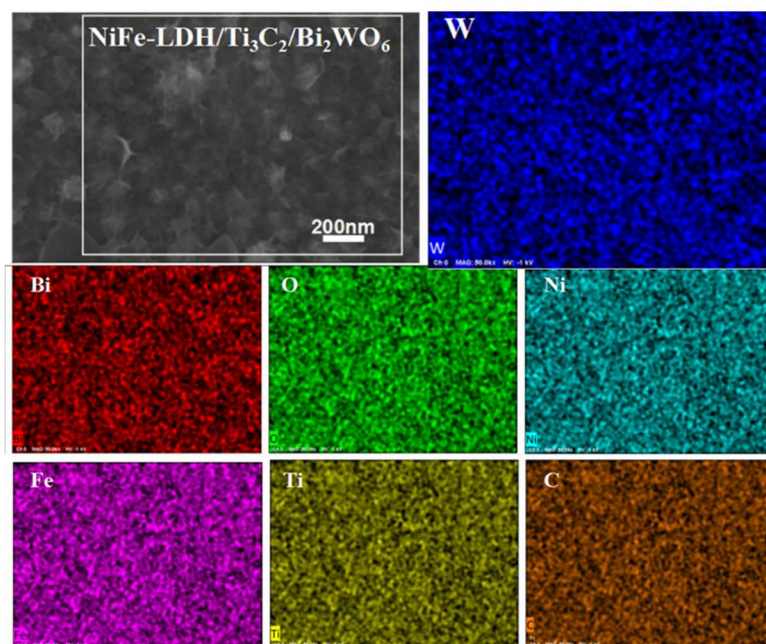

Figure S2. EDX mapping of NiFe-LDH/Ti<sub>3</sub>C<sub>2</sub>/Bi<sub>2</sub>WO<sub>6</sub> NAs.

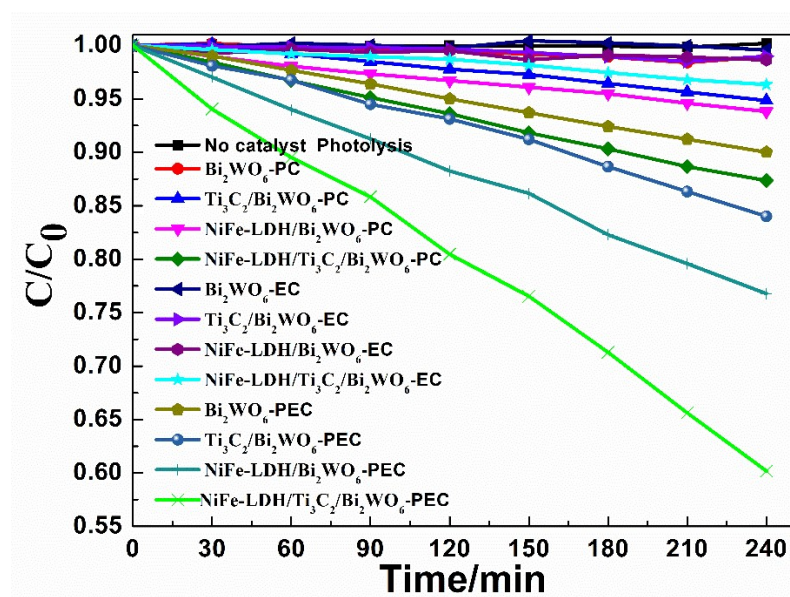

Figure S3. Comparison of EC, PC, and PEC degradation rates over Bi<sub>2</sub>WO<sub>6</sub> NAs, NiFe-LDH/Bi<sub>2</sub>WO<sub>6</sub> NAs, Ti<sub>3</sub>C<sub>2</sub>/Bi<sub>2</sub>WO<sub>6</sub> NAs and NiFe-LDH/Ti<sub>3</sub>C<sub>2</sub>/Bi<sub>2</sub>WO<sub>6</sub> NAs ( $\lambda \geq 420\text{nm}$ , external potential= 1.0 V).

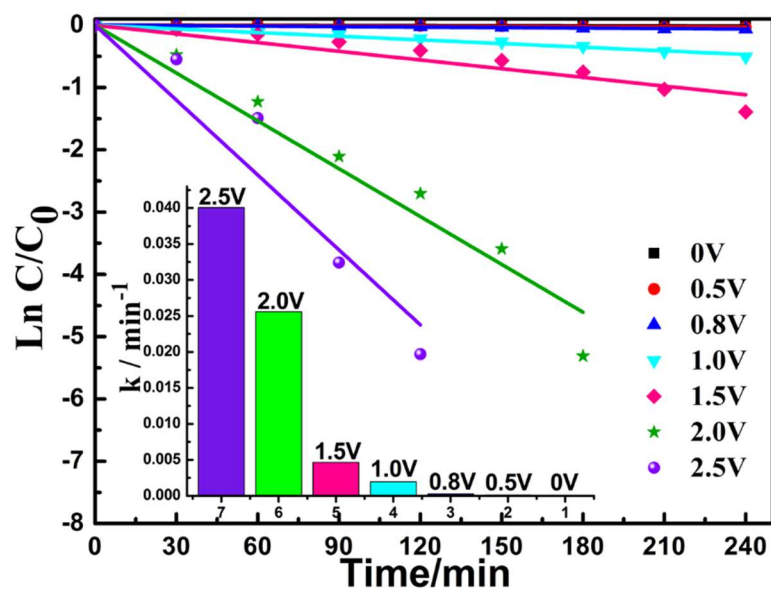

**Figure S4.** Comparison of the PEC degradation rate of BPA over NiFe-LDH/Ti<sub>3</sub>C<sub>2</sub>/Bi<sub>2</sub>WO<sub>6</sub> NAs at different bias voltage ( $\lambda \geq 420$  nm).

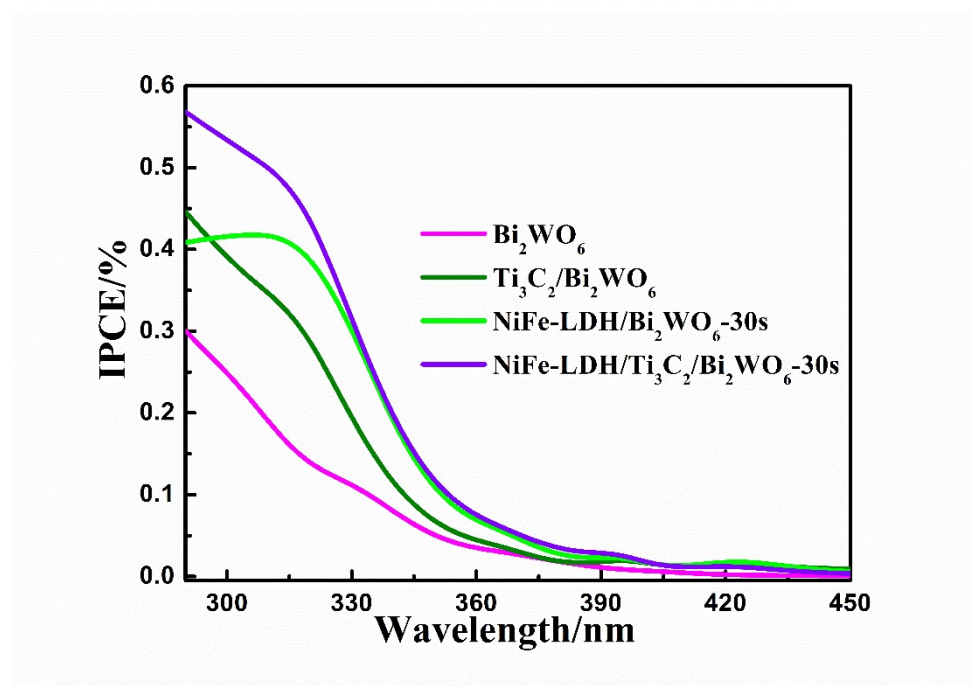

**Figure S5.** Photoelectric conversion efficiency of Bi<sub>2</sub>WO<sub>6</sub> NAs, NiFe-LDH/Bi<sub>2</sub>WO<sub>6</sub> NAs, Ti<sub>3</sub>C<sub>2</sub>/Bi<sub>2</sub>WO<sub>6</sub> NAs, and NiFe-LDH/Ti<sub>3</sub>C<sub>2</sub>/Bi<sub>2</sub>WO<sub>6</sub> NAs.
